# Supplementary material for: Associations of Sputum Biomarkers with Clinical Outcomes in People with Cystic Fibrosis
Source: bioRxiv or medRxiv preprint supplement (doi:10.1101/2022.05.25.22275540), 2022-05-26
Supplement: Supplementary file [file media-1.pdf]

1 **Supplemental Table 1. Investigational Review Board Approvals**

| <b>CF Care Center</b>                                                                                                                       | <b>Reviewing Entity</b>                                                                                             | <b>Protocol Designation</b>                                                                      |
|---------------------------------------------------------------------------------------------------------------------------------------------|---------------------------------------------------------------------------------------------------------------------|--------------------------------------------------------------------------------------------------|
| University of Utah Adult Care Center<br>and the Intermountain CF Center at<br>Primary Children’s Medical Center<br>St. Luke’s Health System | University of Utah IRB                                                                                              | IRB_00011571                                                                                     |
|                                                                                                                                             | St. Luke’s Health System IRB                                                                                        | 13-0547<br>STUDY NUM 1146159<br>WIRB PRO NUM: 20140721                                           |
| Las Vegas CF Center                                                                                                                         | The Western IRB                                                                                                     | INVEST NUM: 112264<br>WO NUM: 1-837046-1<br>Protocol Number 20130530                             |
| National Jewish Health<br>Children’s Hospital Colorado<br>Phoenix Children’s Hospital<br>University of Arizona, Tucson                      | National Jewish Health IRB<br>Colorado Multiple IRB<br>Phoenix Children’s Hospital IRB<br>University of Arizona IRB | Study Number: HS-2797<br>COMIRB Protocol 13-3172<br>PCH IRB #13-087<br>University of Arizona IRB |
| University of New Mexico                                                                                                                    | Human Research Review Committee in<br>the Human Research Protections Office at<br>the University of New Mexico      | Study ID 14-085                                                                                  |
