# Supplementary material for: Associations of Sputum Biomarkers with Clinical Outcomes in People with Cystic Fibrosis
Source: bioRxiv or medRxiv preprint supplement (doi:10.1101/2022.05.25.22275540), 2022-05-26
Supplement: Supplementary file [file media-2.pdf]

3 **Supplemental Table 2. Reagents for ELISA Testing\*****Standard Curves**

| <b>Recombinant Human Protein</b>      | <b>Source and Catalog Number</b> | <b>Curve Range</b>   |
|---------------------------------------|----------------------------------|----------------------|
| C-Reactive Protein (CRP)              | Abcam ab167710                   | 15.625 to 1000 pg/ml |
| Calprotectin or S100A8/A9 Heterodimer | Biolegend 753404                 | 3.9 to 250 ng/ml     |
| High Mobility Group Box-1 (HMGB1)     | Sigma-Aldrich H4652              | 3.9 to 250 ng/ml     |

4

**Capture Antibody**

| <b>Source and Target Species of IgG</b>  | <b>Source and Catalog Number</b> | <b>Concentration Used</b> |
|------------------------------------------|----------------------------------|---------------------------|
| Rabbit polyclonal anti-human CRP         | Abcam ab31156                    | 2.5 µg/ml                 |
| Mouse monoclonal anti-human Calprotectin | LS-Bio LS-C96223                 | 1.5 µg/ml                 |
| Rabbit polyclonal anti-human HMGB1       | Upstate Biotechnology 07-584     | 1.5 µg/ml                 |

5

**Detection Antibody**

| <b>Species</b>                            | <b>Source and Catalog Number</b> | <b>Concentration or Dilution Used</b> |
|-------------------------------------------|----------------------------------|---------------------------------------|
| Mouse monoclonal IgG anti-human CRP       | Abcam ab136176                   | 1.5 µg/ml                             |
| Rabbit polyclonal anti-human Calprotectin | LS-Bio LS122793                  | 1:1500                                |
| Mouse monoclonal anti-human HMGB1         | R&D Systems MAB1690              | 0.75 µg/ml FC                         |

6

**Enzyme Linked Antibody**

| <b>Species</b>                    | <b>Source and Catalog Number</b> | <b>Dilution Used</b> |
|-----------------------------------|----------------------------------|----------------------|
| Goat Anti-Mouse Polyclonal IgG-FC | Millipore AP127P                 | 1:2000               |
| Goat Anti-Rabbit IgG-FC           | Santa Cruz Biotechnology SC-2004 | 1:2000               |
| Goat Anti-Mouse Polyclonal IgG-FC | Millipore AP127P                 | 1:2000               |

7

\* 96-well plates (Costar, Corning Inc, Costar, NY, USA) were incubated overnight with capture antibody diluted according to manufacturer recommendations or 1% bovine serum albumin (BSA, MilliporeSigma, Burlington, MA, USA) or 10% newborn calf serum in phosphate buffered saline (NCS-PBS, MilliporeSigma). Plates were washed 4 times with PBS prior to addition of 1<sup>st</sup> antibodies then washed 6 times prior to addition of horse radish peroxidase-conjugated 2<sup>nd</sup> antibodies. Standards were diluted 1:2 for standard curves using manufacturer's recommendations or 1% BSA or 10% NCS-PBS (MilliporeSigma). All assays were incubated with 3,3',5,5'-Tetramethylbenzidine (TMB) substrate solution (Thermo Scientific, Waltham, MA, USA). Reactions were stopped using 0.18 M H<sub>2</sub>SO<sub>4</sub> after 15-30 minutes and read in an ELISA plate reader at OD<sub>450</sub>. Standard curves were constructed using linear regression of log-transformed mean fluorescence intensities and log-transformed known protein concentrations.

15
