# Supplementary material for: Associations of Sputum Biomarkers with Clinical Outcomes in People with Cystic Fibrosis
Source: bioRxiv or medRxiv preprint supplement (doi:10.1101/2022.05.25.22275540), 2022-05-26
Supplement: Supplementary file [file media-3.pdf]

16 **Supplemental Table 3A. Associations with Exacerbation Within 1 Year of Enrollment by Logistic Regression.\***

| Clinical Univariable                                                      | Estimate | Standard<br>Error<br>(SE) | <i>p</i> | 95% CI            |
|---------------------------------------------------------------------------|----------|---------------------------|----------|-------------------|
| Age (years)                                                               | -0.028   | 0.016                     | 0.09     | -0.059 to 0.0043  |
| Sex (Male=0, Female=1)                                                    | 0.23     | 0.39                      | 0.55     | -0.53 to 1.00     |
| FEV <sub>1</sub> %                                                        | -0.022   | 0.0095                    | 0.02     | -0.041 to -0.0034 |
| Number of Prior<br>Pulmonary Exacerbations                                | 0.64     | 0.17                      | <0.001   | 0.30 to 0.98      |
| Diabetes Status                                                           | 1.36     | 0.59                      | 0.02     | 0.22 to 2.50      |
| <i>Burkholderia cepacia</i><br>Complex Infection Status                   | 16       | 1400                      | 0.99     | -2700 to 2700     |
| Weight-for-age z-score                                                    | -0.24    | 0.20                      | 0.23     | -0.64 to 0.16     |
| Methicillin Sensitive<br><i>Staphylococcus aureus</i><br>Infection Status | -0.18    | 0.39                      | 0.64     | -0.95 to 0.58     |
| Pancreatic Sufficiency                                                    | -0.83    | 0.70                      | 0.24     | -2.20 to 0.54     |
| Methicillin Resistant <i>S</i><br><i>aureus</i> Infection Status          | 0.75     | 0.55                      | 0.18     | -0.34 to 1.80     |
| <i>Pseudomonas aeruginosa</i><br>Infection Status                         | 0.76     | 0.40                      | 0.06     | -0.026 to 1.50    |

17 \*Univariable Logistic Regression. There was no missingness to consider among these clinical variables.

18

19

20 **Supplemental Table 3B. Associations with Exacerbation Within 1 Year of Enrollment by Proportional Hazards Modeling.\***

| Clinical Univariable                                                | Estimate | SE    | Hazard Ratio | <i>p</i> | 95% CI of the Hazard Ratio |
|---------------------------------------------------------------------|----------|-------|--------------|----------|----------------------------|
| Age (years)                                                         | -0.023   | 0.012 | 0.98         | 0.044    | 0.96 to 1.00               |
| Sex (Male=0, Female=1)                                              | 0.16     | 0.24  | 1.20         | 0.49     | 0.74 to 1.90               |
| FEV <sub>1</sub> %                                                  | -0.015   | 0.006 | 0.99         | 0.009    | 0.97 to 1.00               |
| Number of Prior Pulmonary Exacerbations                             | 0.32     | 0.071 | 1.40         | <0.001   | 1.20 to 1.60               |
| Diabetes Status                                                     | 0.61     | 0.26  | 1.80         | 0.02     | 1.10 to 3.10               |
| <i>Burkholderia cepacia</i> Complex Infection Status                | 0.50     | 0.59  | 1.70         | 0.39     | 0.52 to 5.30               |
| Weight-for-age z-score                                              | -0.30    | 0.14  | 0.74         | 0.034    | 0.57 to 0.98               |
| Methicillin Sensitive <i>Staphylococcus aureus</i> Infection Status | -0.14    | 0.24  | 0.87         | 0.56     | 0.55 to 1.40               |
| Pancreatic Sufficiency                                              | -0.56    | 0.51  | 0.57         | 0.27     | 0.21 to 1.60               |
| Methicillin Resistant <i>S aureus</i> Infection Status              | 0.39     | 0.28  | 1.50         | 0.17     | 0.85 to 2.60               |
| <i>Pseudomonas aeruginosa</i> Infection Status                      | 0.43     | 0.25  | 1.50         | 0.092    | 0.93 to 2.50               |

21 \*Univariable Proportional Hazards Models. There was no missingness to consider among these clinical variables.

22

23 **Supplemental Table 3C. Associations with Exacerbation Within Entire Study by Proportional Hazards Modeling.\***

| Clinical Univariable                                                | Estimate | SE    | Hazard Ratio | <i>p</i> | 95% CI of the Hazard Ratio |
|---------------------------------------------------------------------|----------|-------|--------------|----------|----------------------------|
| Age (years)                                                         | -0.024   | 0.01  | 0.98         | 0.022    | 0.96 to 1.00               |
| Sex (Male=0, Female=1)                                              | 0.22     | 0.21  | 1.20         | 0.29     | 0.82 to 1.90               |
| FEV <sub>1</sub> %                                                  | -0.012   | 0.005 | 0.99         | 0.013    | 0.98 to 1.00               |
| Number of Prior Pulmonary Exacerbations                             | 0.28     | 0.064 | 1.30         | <0.001   | 1.20 to 1.50               |
| Diabetes Status                                                     | 0.66     | 0.24  | 1.90         | 0.0062   | 1.20 to 3.10               |
| <i>Burkholderia cepacia</i> Complex Infection Status                | 0.50     | 0.59  | 1.70         | 0.39     | 0.52 to 5.30               |
| Weight-for-age z-score                                              | -0.31    | 0.13  | 0.74         | 0.016    | 0.57 to 0.94               |
| Methicillin Sensitive <i>Staphylococcus aureus</i> Infection Status | -0.04    | 0.21  | 0.96         | 0.83     | 0.63 to 1.40               |
| Pancreatic Sufficiency                                              | -0.67    | 0.46  | 0.51         | 0.15     | 0.21 to 1.30               |
| Methicillin Resistant <i>S aureus</i> Infection Status              | 0.31     | 0.26  | 1.40         | 0.24     | 0.81 to 2.30               |
| <i>Pseudomonas aeruginosa</i> Infection Status                      | 0.22     | 0.22  | 1.20         | 0.32     | 0.81 to 1.9                |

24 \*Univariable Proportional Hazards Models. There was no missingness to consider among these clinical variables.
