# Supplementary material for: Associations of Sputum Biomarkers with Clinical Outcomes in People with Cystic Fibrosis
Source: bioRxiv or medRxiv preprint supplement (doi:10.1101/2022.05.25.22275540), 2022-05-26
Supplement: Supplementary file [file media-4.pdf]

Supplemental Table 4. Log Transformed Biomarker Measurements\*

| Biomarker <sup>†</sup> | Patients | Number of Values |                           |                           | Original Units | Raw Data with Missing Values Omitted |      |       | Adjusted for Immunoassay Limits of Detection |      |      | Adjusted Data with Missing Values Imputed |      |      |
|------------------------|----------|------------------|---------------------------|---------------------------|----------------|--------------------------------------|------|-------|----------------------------------------------|------|------|-------------------------------------------|------|------|
|                        |          | Missing          | Below Limits of Detection | Above Limits of Detection |                | Mean                                 | SD   | CV    | Mean                                         | SD   | CV   | Mean                                      | SD   | CV   |
| Calprotectin           | 114      | 0                | 0                         | 0                         | ng/ml          | 10.9                                 | 5.48 | 0.50  | 11.6                                         | 2.96 | 0.25 | 11.6                                      | 2.96 | 0.25 |
| CRP                    | 114      | 0                | 0                         | 0                         | ng/ml          | 10.1                                 | 3.28 | 0.32  | 12.5                                         | 0.60 | 0.05 | 12.5                                      | 0.60 | 0.05 |
| ENRAGE                 | 113      | 1                | 0                         | 0                         | pg/ml          | 14.5                                 | 1.28 | 0.088 | 14.5                                         | 1.21 | 0.08 | 14.5                                      | 1.21 | 0.08 |
| GMCSF                  | 112      | 2                | 0                         | 0                         | pg/ml          | 2.78                                 | 0.37 | 0.13  | 2.78                                         | 0.37 | 0.13 | 2.78                                      | 0.37 | 0.13 |
| HMGB1                  | 101      | 13               | 0                         | 0                         | ng/ml          | 2.19                                 | 0.72 | 0.33  | 2.19                                         | 0.72 | 0.33 | 2.21                                      | 0.70 | 0.32 |
| ICAM1                  | 112      | 2                | 0                         | 0                         | pg/ml          | 10.0                                 | 0.82 | 0.082 | 10.1                                         | 0.72 | 0.07 | 10.1                                      | 0.72 | 0.07 |
| IFN $\gamma$           | 112      | 2                | 0                         | 0                         | pg/ml          | 4.66                                 | 0.46 | 0.099 | 4.66                                         | 0.46 | 0.10 | 4.67                                      | 0.46 | 0.10 |
| IL1 $\beta$            | 112      | 2                | 0                         | 0                         | pg/ml          | 7.72                                 | 1.48 | 0.19  | 7.72                                         | 1.48 | 0.19 | 7.68                                      | 1.49 | 0.19 |
| IL5                    | 112      | 2                | 0                         | 0                         | pg/ml          | 2.94                                 | 0.40 | 0.14  | 2.94                                         | 0.40 | 0.14 | 2.95                                      | 0.40 | 0.13 |
| IL6                    | 112      | 2                | 0                         | 0                         | pg/ml          | 3.15                                 | 0.79 | 0.25  | 3.15                                         | 0.79 | 0.25 | 3.15                                      | 0.78 | 0.25 |
| IL8                    | 112      | 2                | 0                         | 0                         | pg/ml          | 8.66                                 | 0.51 | 0.06  | 8.66                                         | 0.51 | 0.06 | 8.66                                      | 0.51 | 0.06 |
| IL10                   | 111      | 3                | 1                         | 0                         | pg/ml          | 1.40                                 | 0.93 | 0.67  | 1.43                                         | 0.77 | 0.54 | 1.45                                      | 0.77 | 0.53 |
| IL17A                  | 112      | 2                | 0                         | 0                         | pg/ml          | 5.01                                 | 0.67 | 0.13  | 5.01                                         | 0.67 | 0.13 | 5.01                                      | 0.67 | 0.13 |
| MMP9                   | 112      | 2                | 1                         | 0                         | pg/ml          | 14.4                                 | 1.32 | 0.09  | 14.4                                         | 1.32 | 0.09 | 14.4                                      | 1.31 | 0.09 |
| MPO                    | 113      | 1                | 0                         | 0                         | pg/ml          | 15.8                                 | 1.27 | 0.08  | 15.8                                         | 1.24 | 0.08 | 15.8                                      | 1.24 | 0.08 |
| NE                     | 114      | 0                | 8                         | 0                         | $\mu$ g/ml     | 2.80                                 | 1.33 | 0.47  | 2.60                                         | 1.48 | 0.57 | 2.60                                      | 1.48 | 0.57 |
| PR3 <sup>§</sup>       | 113      | 1                | 0                         | 22                        | pg/ml          | 14.4                                 | 1.22 | 0.08  | 14.7                                         | 1.22 | 0.08 | 14.7                                      | 1.21 | 0.08 |
| SRAGE                  | 112      | 2                | 13                        | 0                         | pg/ml          | 6.38                                 | 1.08 | 0.17  | 6.07                                         | 1.34 | 0.22 | 6.05                                      | 1.35 | 0.22 |
| S100A8                 | 112      | 2                | 0                         | 0                         | pg/ml          | 7.79                                 | 0.80 | 0.10  | 7.79                                         | 0.80 | 0.10 | 7.81                                      | 0.8  | 0.10 |
| S100A9                 | 112      | 2                | 0                         | 2                         | pg/ml          | 8.99                                 | 0.95 | 0.11  | 9.04                                         | 1.03 | 0.11 | 9.02                                      | 1.03 | 0.11 |
| SLPI                   | 112      | 2                | 0                         | 0                         | pg/ml          | 11.7                                 | 1.51 | 0.13  | 11.7                                         | 1.51 | 0.13 | 11.7                                      | 1.50 | 0.13 |
| TARC                   | 110      | 4                | 2                         | 0                         | pg/ml          | 5.72                                 | 0.27 | 0.05  | 5.72                                         | 0.27 | 0.05 | 5.73                                      | 0.27 | 0.05 |
| TNF $\alpha$           | 112      | 2                | 0                         | 0                         | pg/ml          | 4.84                                 | 0.89 | 0.18  | 4.84                                         | 0.89 | 0.18 | 4.85                                      | 0.89 | 0.18 |
| YKL40                  | 112      | 2                | 0                         | 9                         | pg/ml          | 12.0                                 | 1.08 | 0.09  | 12.1                                         | 1.11 | 0.09 | 12.1                                      | 1.10 | 0.09 |

27 \* Additional information on Raw (Unadjusted) and Imputed Biomarker Measurements to accompany main text Table 2.

28 <sup>†</sup> **Abbreviations:** **CRP** C reactive protein; **ENRAGE** Extracellular newly identified receptor for advanced glycation end products  
 29 binding protein; **GMCSF** granulocyte macrophage colony stimulating factor; **HMGB1** high mobility group box 1 protein; **ICAM1**  
 30 intracellular adhesion molecule 1; **IFN $\gamma$**  interferon  $\gamma$ ; **IL** interleukin; **MMP9** matrix metalloproteinase 9; **MPO** myeloperoxidase; **NE**  
 31 neutrophil elastase; **PR3** proteinase 3; **sRAGE** soluble receptor for advanced glycation products; **SLPI** secretory leukoprotease  
 32 inhibitor; **TARC** thymus and activation regulation chemokine; **TNF $\alpha$**  tumor necrosis factor  $\alpha$ ; **YKL40** chitinase 3-like 1 protein; **SD**  
 33 Standard Deviation; **CV** Coefficient of Variation.

34 <sup>§</sup> After log transformation, adjusted and imputed data for PR-3 were greater than raw data, *t*-test *p* = 0.001, both comparisons.

35
