# Supplementary material for: Associations of Sputum Biomarkers with Clinical Outcomes in People with Cystic Fibrosis
Source: bioRxiv or medRxiv preprint supplement (doi:10.1101/2022.05.25.22275540), 2022-05-26
Supplement: Supplementary file [file media-5.pdf]

**Supplemental Table 5. Pearson Correlations between Biomarkers.**

|              | Calprotectin | CRP   | ENRAGE | GMCSF | HMGB1 | ICAM1 | IFNG | IL1B  | IL5  | IL6  | IL8  |
|--------------|--------------|-------|--------|-------|-------|-------|------|-------|------|------|------|
| Calprotectin |              |       |        |       |       |       |      | 0.41  |      |      |      |
| CRP          |              |       |        | -0.42 |       |       |      |       |      |      |      |
| ENRAGE       |              |       |        | 0.60  |       | 0.47  |      | 0.53  |      |      | 0.43 |
| GMCSF        |              | -0.42 | 0.60   |       |       | 0.49  | 0.57 |       | 0.62 |      | 0.45 |
| HMGB1        |              |       |        |       |       |       |      |       |      |      |      |
| ICAM1        |              |       | 0.47   | 0.49  |       |       | 0.48 | 0.47  | 0.41 | 0.48 |      |
| IFN $\gamma$ |              |       |        | 0.57  |       | 0.48  |      |       | 0.91 | 0.41 |      |
| IL1 $\beta$  | 0.41         |       | 0.53   |       |       | 0.47  |      |       |      |      | 0.67 |
| IL5          |              |       |        | 0.62  |       | 0.41  | 0.91 |       |      |      |      |
| IL6          |              |       |        |       |       | 0.48  | 0.41 |       |      |      |      |
| IL8          |              |       | 0.43   | 0.45  |       |       |      | 0.67  |      |      |      |
| IL10         |              |       |        | 0.44  |       |       | 0.74 |       | 0.65 | 0.55 |      |
| IL17A        |              |       |        | 0.52  |       | 0.42  | 0.78 |       | 0.76 |      |      |
| MMP9         |              |       | 0.72   | 0.46  |       | 0.54  |      | 0.86  |      |      | 0.62 |
| MPO          |              |       | 0.88   | 0.54  |       | 0.50  |      | 0.46  |      |      | 0.50 |
| NE           | 0.45         |       |        |       |       | 0.42  |      | 0.79  |      |      | 0.51 |
| PR3          | 0.41         |       |        |       |       |       |      | 0.75  |      |      | 0.69 |
| sRAGE        |              |       | 0.45   |       |       | 0.53  | 0.50 | 0.69  | 0.54 |      |      |
| S100A8       |              |       |        |       |       |       |      |       |      | 0.43 |      |
| S100A9       |              |       |        |       |       |       |      | -0.43 |      |      |      |
| SLPI         |              |       |        |       |       |       |      | -0.47 |      | 0.57 |      |
| TARC         |              |       |        | 0.46  |       |       | 0.91 |       | 0.89 |      |      |
| TNF $\alpha$ |              |       |        | 0.42  |       |       | 0.53 |       | 0.43 |      |      |
| YKL40        |              |       |        |       |       | 0.54  |      | 0.76  |      |      | 0.66 |

|              | IL17A | MMP9  | MPO  | NE    | PR3   | sRAGE | S100A8 | S100A9 | SLPI  | TARC | TNFA | YKL40 |
|--------------|-------|-------|------|-------|-------|-------|--------|--------|-------|------|------|-------|
| Calprotectin |       |       |      | 0.45  | 0.41  |       |        |        |       |      |      |       |
| CRP          |       |       |      |       |       |       |        |        |       |      |      |       |
| ENRAGE       |       | 0.72  | 0.88 |       |       | 0.45  |        |        |       |      |      |       |
| GMCSF        | 0.52  | 0.46  | 0.54 |       |       |       |        |        |       | 0.46 | 0.42 |       |
| HMGB1        |       |       |      |       |       |       |        |        |       |      |      |       |
| ICAM1        | 0.42  | 0.54  | 0.50 | 0.42  |       | 0.53  |        |        |       |      |      | 0.54  |
| IFN $\gamma$ | 0.78  |       |      |       |       | 0.50  |        |        |       | 0.91 | 0.53 |       |
| IL1 $\beta$  |       | 0.86  | 0.46 | 0.79  | 0.75  | 0.69  |        | -0.43  | -0.47 |      |      | 0.76  |
| IL5          | 0.76  |       |      |       |       | 0.54  |        |        |       | 0.89 | 0.43 |       |
| IL6          |       |       |      |       |       |       | 0.43   |        | 0.57  |      |      |       |
| IL8          |       | 0.62  | 0.50 | 0.51  | 0.69  |       |        |        |       |      |      | 0.66  |
| IL10         | 0.61  |       |      |       |       |       |        |        | 0.41  | 0.65 | 0.45 |       |
| IL17A        |       |       |      |       |       | 0.60  |        |        |       | 0.71 | 0.65 |       |
| MMP9         |       |       | 0.64 | 0.68  | 0.65  | 0.65  |        | -0.42  | -0.44 |      |      | 0.66  |
| MPO          |       | 0.64  |      | 0.46  |       | 0.48  |        |        |       |      |      | 0.43  |
| NE           |       | 0.68  | 0.46 |       | 0.73  | 0.80  | -0.44  | -0.44  | -0.60 |      |      | 0.79  |
| PR3          |       | 0.65  |      | 0.73  |       | 0.51  |        |        | -0.43 |      |      | 0.73  |
| sRAGE        | 0.60  | 0.65  | 0.48 | 0.80  | 0.51  |       |        |        | -0.48 | 0.49 |      | 0.69  |
| S100A8       |       |       |      | -0.44 |       |       |        |        |       |      |      |       |
| S100A9       |       | -0.42 |      | -0.44 |       |       |        |        |       |      |      | -0.45 |
| SLPI         |       | -0.44 |      | -0.60 | -0.43 | -0.48 |        |        |       |      |      |       |
| TARC         | 0.71  |       |      |       |       | 0.49  |        |        |       |      | 0.47 |       |
| TNF $\alpha$ | 0.65  |       |      |       |       |       |        |        |       | 0.47 |      |       |
| YKL40        |       | 0.66  | 0.43 | 0.79  | 0.73  | 0.69  |        | -0.45  |       |      |      |       |

\* All positive and **negative** correlations shown were significant after stringent Bonferroni correction; all have uncorrected  $p < 1 \times 10^{-5}$ .

Correlations were identical whether using data only adjusted for biomarker detection limits or adjusted and imputed for missingness.

† **Abbreviations:** CRP C reactive protein; ENRAGE Extracellular newly identified receptor for advanced glycation end products

binding protein; GMCSF granulocyte macrophage colony stimulating factor; HMGB1 high mobility group box 1 protein; ICAM1

intracellular adhesion molecule 1; IFN $\gamma$  interferon  $\gamma$ ; IL interleukin; MMP9 matrix metalloproteinase 9; MPO myeloperoxidase; NE

neutrophil elastase; PR3 proteinase 3; sRAGE soluble receptor for advanced glycation products; SLPI secretory leukoprotease

inhibitor; TARC thymus and activation regulation chemokine; TNF $\alpha$  tumor necrosis factor  $\alpha$ ; YKL40 chitinase 3-like 1 protein.
