# Supplementary material for: Associations of Sputum Biomarkers with Clinical Outcomes in People with Cystic Fibrosis
Source: bioRxiv or medRxiv preprint supplement (doi:10.1101/2022.05.25.22275540), 2022-05-26
Supplement: Supplementary file [file media-6.pdf]

**Supplemental Table 6. Univariable Proportional Hazards Models of Time to Next Pulmonary Exacerbation**

| Biomarker*   | Data Adjusted for Detection Limits |      |              |          |                            | Data Adjusted and Imputed for Missingness |      |              |          |                            |
|--------------|------------------------------------|------|--------------|----------|----------------------------|-------------------------------------------|------|--------------|----------|----------------------------|
|              | Estimate                           | SE   | Hazard Ratio | <i>p</i> | 95% CI of the Hazard Ratio | Estimate                                  | SE   | Hazard Ratio | <i>p</i> | 95% CI of the Hazard Ratio |
| MPO          | 0.24                               | 0.10 | 1.28         | 0.010    | 1.06 to 1.54               | 0.24                                      | 0.09 | 1.27         | 0.010    | 1.06 to 1.53               |
| NE           | 0.18                               | 0.08 | 1.20         | 0.018    | 1.03 to 1.39               | 0.18                                      | 0.08 | 1.20         | 0.018    | 1.03 to 1.39               |
| S100A9       | -0.27                              | 0.12 | 0.76         | 0.028    | 0.60 to 0.97               | -0.19                                     | 0.13 | 0.82         | 0.130    | 0.64 to 1.06               |
| SRAGE        | 0.20                               | 0.09 | 1.22         | 0.030    | 1.02 to 1.45               | 0.21                                      | 0.09 | 1.24         | 0.020    | 1.03 to 1.48               |
| ENRAGE       | 0.20                               | 0.09 | 1.22         | 0.032    | 1.02 to 1.46               | 0.20                                      | 0.09 | 1.22         | 0.029    | 1.02 to 1.46               |
| IL1 $\beta$  | 0.16                               | 0.08 | 1.17         | 0.041    | 1.01 to 1.37               | 0.16                                      | 0.08 | 1.17         | 0.039    | 1.01 to 1.37               |
| YKL40        | 0.19                               | 0.10 | 1.21         | 0.055    | 1.00 to 1.46               | 0.20                                      | 0.09 | 1.22         | 0.036    | 1.01 to 1.46               |
| IL17A        | 0.30                               | 0.17 | 1.35         | 0.078    | 0.97 to 1.88               | 0.29                                      | 0.17 | 1.33         | 0.084    | 0.96 to 1.84               |
| PR3          | 0.14                               | 0.09 | 1.15         | 0.110    | 0.97 to 1.37               | 0.17                                      | 0.10 | 1.18         | 0.086    | 0.98 to 1.43               |
| ICAM1        | 0.24                               | 0.15 | 1.27         | 0.120    | 0.94 to 1.71               | 0.22                                      | 0.14 | 1.25         | 0.100    | 0.96 to 1.64               |
| IL8          | 0.36                               | 0.24 | 1.44         | 0.130    | 0.90 to 2.29               | 0.35                                      | 0.23 | 1.43         | 0.130    | 0.90 to 2.26               |
| Calprotectin | 0.05                               | 0.04 | 1.06         | 0.130    | 0.98 to 1.13               | 0.05                                      | 0.04 | 1.06         | 0.130    | 0.98 to 1.13               |
| MMP9         | 0.13                               | 0.08 | 1.13         | 0.130    | 0.96 to 1.34               | 0.16                                      | 0.08 | 1.18         | 0.050    | 1.00 to 1.38               |
| SLPI         | -0.09                              | 0.08 | 0.91         | 0.250    | 0.78 to 1.07               | -0.10                                     | 0.08 | 0.91         | 0.240    | 0.78 to 1.06               |
| IL5          | 0.32                               | 0.30 | 1.38         | 0.290    | 0.76 to 2.51               | 0.30                                      | 0.30 | 1.35         | 0.320    | 0.75 to 2.43               |
| S100A8       | -0.15                              | 0.14 | 0.86         | 0.300    | 0.65 to 1.14               | -0.13                                     | 0.14 | 0.88         | 0.340    | 0.66 to 1.15               |
| TARC         | 0.40                               | 0.44 | 1.49         | 0.370    | 0.62 to 3.55               | 0.33                                      | 0.42 | 1.39         | 0.430    | 0.61 to 3.13               |
| GMCSF        | 0.24                               | 0.27 | 1.27         | 0.370    | 0.75 to 2.15               | 0.15                                      | 0.31 | 1.16         | 0.640    | 0.63 to 2.13               |
| HMGB1        | 0.11                               | 0.15 | 1.12         | 0.450    | 0.84 to 1.49               | 0.11                                      | 0.15 | 1.11         | 0.470    | 0.84 to 1.48               |
| TNF $\alpha$ | -0.08                              | 0.12 | 0.93         | 0.510    | 0.73 to 1.17               | -0.09                                     | 0.12 | 0.92         | 0.460    | 0.73 to 1.16               |
| IFN $\gamma$ | 0.15                               | 0.25 | 1.16         | 0.560    | 0.71 to 1.9                | 0.13                                      | 0.25 | 1.14         | 0.600    | 0.70 to 1.86               |
| IL6          | -0.05                              | 0.14 | 0.95         | 0.720    | 0.72 to 1.26               | -0.04                                     | 0.14 | 0.96         | 0.760    | 0.73 to 1.26               |
| IL10         | -0.03                              | 0.15 | 0.97         | 0.830    | 0.72 to 1.29               | -0.03                                     | 0.15 | 0.97         | 0.830    | 0.72 to 1.3                |
| CRP          | 0.02                               | 0.18 | 1.02         | 0.890    | 0.72 to 1.46               | 0.05                                      | 0.34 | 1.05         | 0.890    | 0.54 to 2.05               |

47

\* **Abbreviations:** CRP C reactive protein; ENRAGE Extracellular newly identified receptor for advanced glycation end products

48

binding protein; GMCSF granulocyte macrophage colony stimulating factor; HMGB1 high mobility group box 1 protein; ICAM1

49

intracellular adhesion molecule 1; IFN $\gamma$  interferon  $\gamma$ ; IL interleukin; MMP9 matrix metalloproteinase 9; MPO myeloperoxidase; NE

50

neutrophil elastase; PR3 proteinase 3; sRAGE soluble receptor for advanced glycation products; SLPI secretory leukoprotease

51

inhibitor; TARC thymus and activation regulation chemokine; TNF $\alpha$  tumor necrosis factor  $\alpha$ ; YKL40 chitinase 3-like 1 protein.

52
