# Supplementary material for: Associations of Sputum Biomarkers with Clinical Outcomes in People with Cystic Fibrosis
Source: bioRxiv or medRxiv preprint supplement (doi:10.1101/2022.05.25.22275540), 2022-05-26
Supplement: Supplementary file [file media-8.pdf]

94  
95

**Supplemental Table 8A. Biomarkers as Univariable Adjustments to Weight-for-Age z-Score in Proportional Hazards Models of Time to Next Exacerbation.\***

| Univariable Biomarker <sup>†</sup> | Data Adjusted for Detection Limits |      |              |          |                            | Data Adjusted and Imputed for Missingness |      |              |          |                            |
|------------------------------------|------------------------------------|------|--------------|----------|----------------------------|-------------------------------------------|------|--------------|----------|----------------------------|
|                                    | Estimate                           | SE   | Hazard Ratio | <i>p</i> | 95% CI of the Hazard Ratio | Estimate                                  | SE   | Hazard Ratio | <i>p</i> | 95% CI of the Hazard Ratio |
| MPO                                | 0.29                               | 0.09 | 1.33         | 0.002    | 1.11 to 1.60               | 0.28                                      | 0.09 | 1.32         | 0.003    | 1.10 to 1.58               |
| NE                                 | 0.17                               | 0.08 | 1.18         | 0.025    | 1.02 to 1.37               | 0.17                                      | 0.08 | 1.18         | 0.025    | 1.02 to 1.37               |
| S100A9                             | -0.27                              | 0.12 | 0.76         | 0.028    | 0.60 to 0.97               | -0.19                                     | 0.13 | 0.83         | 0.16     | 0.64 to 1.08               |
| SRAGE                              | 0.19                               | 0.09 | 1.21         | 0.037    | 1.01 to 1.44               | 0.20                                      | 0.09 | 1.22         | 0.025    | 1.03 to 1.46               |
| ENRAGE                             | 0.25                               | 0.09 | 1.29         | 0.006    | 1.07 to 1.55               | 0.25                                      | 0.09 | 1.29         | 0.007    | 1.07 to 1.54               |
| IL1β                               | 0.17                               | 0.08 | 1.18         | 0.029    | 1.02 to 1.37               | 0.17                                      | 0.08 | 1.18         | 0.028    | 1.02 to 1.37               |
| YKL40                              | 0.19                               | 0.09 | 1.20         | 0.048    | 1.00 to 1.45               | 0.21                                      | 0.09 | 1.24         | 0.02     | 1.03 to 1.48               |
| IL17A                              | 0.43                               | 0.18 | 1.54         | 0.017    | 1.08 to 2.20               | 0.42                                      | 0.18 | 1.53         | 0.017    | 1.08 to 2.16               |
| PR3                                | 0.12                               | 0.09 | 1.13         | 0.16     | 0.95 to 1.33               | 0.17                                      | 0.10 | 1.18         | 0.076    | 0.98 to 1.43               |
| ICAM1                              | 0.32                               | 0.16 | 1.38         | 0.039    | 1.02 to 1.87               | 0.30                                      | 0.14 | 1.35         | 0.032    | 1.03 to 1.77               |
| IL8                                | 0.42                               | 0.24 | 1.52         | 0.077    | 0.96 to 2.41               | 0.41                                      | 0.23 | 1.51         | 0.079    | 0.95 to 2.38               |
| Calprotectin                       | 0.058                              | 0.04 | 1.06         | 0.10     | 0.99 to 1.14               | 0.06                                      | 0.04 | 1.06         | 0.10     | 0.99 to 1.14               |
| MMP9                               | 0.16                               | 0.09 | 1.17         | 0.066    | 0.99 to 1.39               | 0.20                                      | 0.08 | 1.22         | 0.017    | 1.04 to 1.44               |
| SLPI                               | -0.10                              | 0.08 | 0.91         | 0.25     | 0.77 to 1.07               | -0.10                                     | 0.08 | 0.91         | 0.25     | 0.77 to 1.07               |
| IL5                                | 0.39                               | 0.30 | 1.48         | 0.20     | 0.82 to 2.68               | 0.36                                      | 0.30 | 1.44         | 0.23     | 0.80 to 2.58               |
| S100A8                             | 0.001                              | 0.16 | 1.00         | 1.00     | 0.74 to 1.36               | 0.01                                      | 0.15 | 1.01         | 0.97     | 0.74 to 1.36               |
| TARC                               | 0.43                               | 0.44 | 1.54         | 0.33     | 0.64 to 3.67               | 0.32                                      | 0.42 | 1.38         | 0.44     | 0.61 to 3.15               |
| GMCSF                              | 0.46                               | 0.28 | 1.59         | 0.10     | 0.91 to 2.77               | 0.39                                      | 0.33 | 1.48         | 0.23     | 0.78 to 2.81               |
| HMGB1                              | 0.10                               | 0.16 | 1.11         | 0.51     | 0.82 to 1.51               | 0.10                                      | 0.15 | 1.10         | 0.52     | 0.82 to 1.49               |
| TNFα                               | -0.04                              | 0.12 | 0.96         | 0.75     | 0.77 to 1.21               | -0.05                                     | 0.12 | 0.95         | 0.65     | 0.76 to 1.19               |
| IFNγ                               | 0.25                               | 0.25 | 1.28         | 0.33     | 0.78 to 2.09               | 0.22                                      | 0.25 | 1.25         | 0.37     | 0.77 to 2.04               |
| IL6                                | 0.02                               | 0.14 | 1.02         | 0.87     | 0.78 to 1.35               | 0.02                                      | 0.14 | 1.02         | 0.89     | 0.77 to 1.34               |
| IL10                               | 0.09                               | 0.16 | 1.09         | 0.59     | 0.80 to 1.49               | 0.08                                      | 0.16 | 1.08         | 0.63     | 0.79 to 1.48               |
| CRP                                | 0.01                               | 0.18 | 1.01         | 0.95     | 0.71 to 1.44               | -0.02                                     | 0.34 | 0.98         | 0.96     | 0.50 to 1.92               |

\*This table provides complete results using data adjusted for biomarker measurements outside the limits of detection as well as data adjusted and imputed for data missingness.

<sup>†</sup> **Abbreviations:** **CRP** C reactive protein; **ENRAGE** Extracellular newly identified receptor for advanced glycation end products binding protein; **GMCSF** granulocyte macrophage colony stimulating factor; **HMGB1** high mobility group box 1 protein; **ICAM1** intracellular adhesion molecule 1; **IFNγ** interferon γ; **IL** interleukin; **MMP9** matrix metalloproteinase 9; **MPO** myeloperoxidase; **NE** neutrophil elastase; **PR3** proteinase 3; **sRAGE** soluble receptor for advanced glycation products; **SLPI** secretory leukoprotease inhibitor; **TARC** thymus and activation regulation chemokine; **TNFα** tumor necrosis factor α; **YKL40** chitinase 3-like 1 protein.

96  
97  
98  
99  
100  
101  
102  
103  
104

**Supplemental Table 8B. Biomarkers as Univariable Adjustments to Diabetes in Proportional Hazards Models of Time to Next Exacerbation.\***

| Univariable Biomarker | Data Adjusted for Detection Limits |      |              |          |                            | Data Adjusted and Imputed for Missingness |      |              |          |                            |
|-----------------------|------------------------------------|------|--------------|----------|----------------------------|-------------------------------------------|------|--------------|----------|----------------------------|
|                       | Estimate                           | SE   | Hazard Ratio | <i>p</i> | 95% CI of the Hazard Ratio | Estimate                                  | SE   | Hazard Ratio | <i>p</i> | 95% CI of the Hazard Ratio |
| MPO                   | 0.22                               | 0.10 | 1.24         | 0.027    | 1.03 to 1.50               | 0.21                                      | 0.10 | 1.23         | 0.028    | 1.02 to 1.48               |
| NE                    | 0.17                               | 0.08 | 1.19         | 0.027    | 1.02 to 1.38               | 0.17                                      | 0.08 | 1.19         | 0.027    | 1.02 to 1.38               |
| S100A9                | -0.25                              | 0.13 | 0.78         | 0.046    | 0.61 to 1.00               | -0.16                                     | 0.13 | 0.85         | 0.220    | 0.66 to 1.10               |
| SRAGE                 | 0.19                               | 0.09 | 1.21         | 0.033    | 1.02 to 1.45               | 0.21                                      | 0.09 | 1.23         | 0.022    | 1.03 to 1.47               |
| ENRAGE                | 0.18                               | 0.09 | 1.19         | 0.059    | 0.99 to 1.43               | 0.18                                      | 0.09 | 1.19         | 0.057    | 0.99 to 1.43               |
| IL1 $\beta$           | 0.15                               | 0.08 | 1.17         | 0.052    | 1.00 to 1.36               | 0.15                                      | 0.08 | 1.17         | 0.051    | 1.00 to 1.36               |
| YKL40                 | 0.17                               | 0.10 | 1.19         | 0.087    | 0.98 to 1.44               | 0.18                                      | 0.10 | 1.19         | 0.071    | 0.98 to 1.45               |
| IL17A                 | 0.30                               | 0.16 | 1.34         | 0.073    | 0.97 to 1.86               | 0.26                                      | 0.16 | 1.30         | 0.110    | 0.95 to 1.77               |
| PR3                   | 0.12                               | 0.09 | 1.13         | 0.17     | 0.95 to 1.35               | 0.15                                      | 0.10 | 1.16         | 0.150    | 0.95 to 1.41               |
| ICAM1                 | 0.24                               | 0.16 | 1.27         | 0.12     | 0.94 to 1.72               | 0.21                                      | 0.14 | 1.24         | 0.120    | 0.94 to 1.63               |
| IL8                   | 0.28                               | 0.23 | 1.32         | 0.23     | 0.84 to 2.09               | 0.26                                      | 0.23 | 1.30         | 0.250    | 0.83 to 2.04               |
| Calprotectin          | 0.06                               | 0.04 | 1.06         | 0.11     | 0.99 to 1.14               | 0.06                                      | 0.04 | 1.06         | 0.110    | 0.99 to 1.14               |
| MMP9                  | 0.11                               | 0.08 | 1.12         | 0.19     | 0.95 to 1.32               | 0.14                                      | 0.08 | 1.15         | 0.085    | 0.98 to 1.36               |
| SLPI                  | -0.07                              | 0.08 | 0.93         | 0.37     | 0.79 to 1.09               | -0.08                                     | 0.08 | 0.93         | 0.330    | 0.79 to 1.08               |
| IL5                   | 0.35                               | 0.30 | 1.41         | 0.25     | 0.78 to 2.55               | 0.33                                      | 0.30 | 1.39         | 0.270    | 0.77 to 2.51               |
| S100A8                | -0.16                              | 0.14 | 0.86         | 0.27     | 0.65 to 1.13               | -0.16                                     | 0.14 | 0.86         | 0.250    | 0.65 to 1.12               |
| TARC                  | 0.43                               | 0.45 | 1.54         | 0.33     | 0.64 to 3.72               | 0.44                                      | 0.42 | 1.55         | 0.290    | 0.69 to 3.5                |
| GMCSF                 | 0.19                               | 0.27 | 1.21         | 0.47     | 0.72 to 2.03               | 0.08                                      | 0.30 | 1.08         | 0.790    | 0.60 to 1.97               |
| HMGB1                 | 0.10                               | 0.15 | 1.10         | 0.53     | 0.82 to 1.48               | 0.09                                      | 0.15 | 1.09         | 0.550    | 0.81 to 1.47               |
| TNF $\alpha$          | -0.07                              | 0.12 | 0.93         | 0.56     | 0.74 to 1.17               | -0.07                                     | 0.12 | 0.93         | 0.540    | 0.74 to 1.17               |
| IFN $\gamma$          | 0.19                               | 0.25 | 1.21         | 0.45     | 0.74 to 1.97               | 0.18                                      | 0.25 | 1.19         | 0.480    | 0.73 to 1.94               |
| IL6                   | -0.02                              | 0.14 | 0.98         | 0.89     | 0.74 to 1.29               | 0.00                                      | 0.14 | 1.00         | 0.970    | 0.76 to 1.31               |
| IL10                  | 0.06                               | 0.15 | 1.06         | 0.70     | 0.79 to 1.43               | 0.07                                      | 0.16 | 1.07         | 0.680    | 0.79 to 1.45               |
| CRP                   | 0.00                               | 0.18 | 1.00         | 0.99     | 0.70 to 1.43               | 0.02                                      | 0.34 | 1.02         | 0.960    | 0.52 to 1.99               |

\*This table provides complete results using data adjusted for biomarker measurements outside the limits of detection as well as data adjusted and imputed for data missingness.

† **Abbreviations:** **CRP** C reactive protein; **ENRAGE** Extracellular newly identified receptor for advanced glycation end products binding protein; **GMCSF** granulocyte macrophage colony stimulating factor; **HMGB1** high mobility group box 1 protein; **ICAM1** intracellular adhesion molecule 1; **IFN $\gamma$**  interferon  $\gamma$ ; **IL** interleukin; **MMP9** matrix metalloproteinase 9; **MPO** myeloperoxidase; **NE** neutrophil elastase; **PR3** proteinase 3; **sRAGE** soluble receptor for advanced glycation products; **SLPI** secretory leukoprotease inhibitor; **TARC** thymus and activation regulation chemokine; **TNF $\alpha$**  tumor necrosis factor  $\alpha$ ; **YKL40** chitinase 3-like 1 protein.

114  
115**Supplemental Table 8C. Biomarkers as Univariable Adjustments to FEV<sub>1</sub>% in Proportional Hazards Models of Time to Next Exacerbation.\***

| Univariable Biomarker <sup>†</sup> | Data Adjusted for Detection Limits |      |              |          |                            | Data Adjusted and Imputed for Missingness |      |              |          |                            |
|------------------------------------|------------------------------------|------|--------------|----------|----------------------------|-------------------------------------------|------|--------------|----------|----------------------------|
|                                    | Estimate                           | SE   | Hazard Ratio | <i>p</i> | 95% CI of the Hazard Ratio | Estimate                                  | SE   | Hazard Ratio | <i>p</i> | 95% CI of the Hazard Ratio |
| MPO                                | 0.19                               | 0.10 | 1.21         | 0.06     | 0.99 to 1.48               | 0.18                                      | 0.10 | 1.20         | 0.07     | 0.98 to 1.46               |
| NE                                 | 0.14                               | 0.08 | 1.15         | 0.09     | 0.98 to 1.35               | 0.14                                      | 0.08 | 1.15         | 0.09     | 0.98 to 1.35               |
| S100A9                             | -0.24                              | 0.12 | 0.79         | 0.051    | 0.62 to 1.00               | -0.18                                     | 0.12 | 0.83         | 0.14     | 0.65 to 1.06               |
| SRAGE                              | 0.14                               | 0.10 | 1.15         | 0.14     | 0.95 to 1.39               | 0.15                                      | 0.10 | 1.16         | 0.12     | 0.96 to 1.40               |
| ENRAGE                             | 0.15                               | 0.10 | 1.16         | 0.12     | 0.96 to 1.41               | 0.15                                      | 0.10 | 1.16         | 0.12     | 0.96 to 1.40               |
| IL1 $\beta$                        | 0.13                               | 0.08 | 1.14         | 0.11     | 0.97 to 1.33               | 0.13                                      | 0.08 | 1.14         | 0.11     | 0.97 to 1.33               |
| YKL40                              | 0.15                               | 0.1  | 1.16         | 0.14     | 0.95 to 1.41               | 0.16                                      | 0.10 | 1.18         | 0.09     | 0.97 to 1.43               |
| IL17A                              | 0.24                               | 0.17 | 1.28         | 0.16     | 0.91 to 1.79               | 0.22                                      | 0.17 | 1.25         | 0.19     | 0.90 to 1.74               |
| PR3                                | 0.11                               | 0.09 | 1.12         | 0.22     | 0.94 to 1.35               | 0.11                                      | 0.10 | 1.12         | 0.27     | 0.92 to 1.37               |
| ICAM1                              | 0.18                               | 0.15 | 1.20         | 0.23     | 0.89 to 1.63               | 0.17                                      | 0.14 | 1.19         | 0.22     | 0.90 to 1.56               |
| IL8                                | 0.29                               | 0.24 | 1.33         | 0.23     | 0.83 to 2.14               | 0.27                                      | 0.24 | 1.31         | 0.25     | 0.82 to 2.09               |
| Calprotectin                       | 0.04                               | 0.04 | 1.04         | 0.34     | 0.96 to 1.11               | 0.04                                      | 0.04 | 1.04         | 0.34     | 0.96 to 1.11               |
| MMP9                               | 0.08                               | 0.09 | 1.08         | 0.37     | 0.91 to 1.29               | 0.11                                      | 0.09 | 1.11         | 0.22     | 0.94 to 1.33               |
| SLPI                               | -0.03                              | 0.09 | 0.98         | 0.77     | 0.82 to 1.15               | -0.02                                     | 0.09 | 0.98         | 0.79     | 0.83 to 1.15               |
| IL5                                | 0.25                               | 0.31 | 1.28         | 0.43     | 0.70 to 2.35               | 0.22                                      | 0.31 | 1.24         | 0.48     | 0.68 to 2.27               |
| S100A8                             | -0.11                              | 0.15 | 0.89         | 0.44     | 0.67 to 1.19               | -0.10                                     | 0.14 | 0.91         | 0.50     | 0.68 to 1.20               |
| TARC                               | 0.31                               | 0.45 | 1.37         | 0.48     | 0.57 to 3.27               | 0.26                                      | 0.42 | 1.30         | 0.53     | 0.58 to 2.94               |
| GMCSF                              | 0.24                               | 0.28 | 1.27         | 0.40     | 0.73 to 2.2                | 0.15                                      | 0.33 | 1.16         | 0.65     | 0.61 to 2.19               |
| HMGB1                              | 0.08                               | 0.16 | 1.09         | 0.60     | 0.80 to 1.47               | 0.10                                      | 0.15 | 1.10         | 0.52     | 0.82 to 1.48               |
| TNF $\alpha$                       | -0.09                              | 0.12 | 0.91         | 0.46     | 0.72 to 1.16               | -0.10                                     | 0.12 | 0.91         | 0.41     | 0.71 to 1.15               |
| IFN $\gamma$                       | 0.06                               | 0.26 | 1.06         | 0.83     | 0.63 to 1.77               | 0.03                                      | 0.26 | 1.03         | 0.90     | 0.621-1.72                 |
| IL6                                | -0.08                              | 0.14 | 0.93         | 0.59     | 0.70 to 1.23               | -0.07                                     | 0.14 | 0.93         | 0.63     | 0.708-1.23                 |
| IL10                               | -0.04                              | 0.15 | 0.96         | 0.77     | 0.71 to 1.29               | -0.05                                     | 0.16 | 0.96         | 0.77     | 0.705-1.29                 |
| CRP                                | 0.00                               | 0.18 | 1.00         | 0.99     | 0.70 to 1.44               | 0.07                                      | 0.35 | 1.07         | 0.84     | 0.543-2.12                 |

116 \*This table provides complete results using data adjusted for biomarker measurements outside the limits of detection as well as data  
 117 adjusted and imputed for data missingness.

118 <sup>†</sup> **Abbreviations:** **CRP** C reactive protein; **ENRAGE** Extracellular newly identified receptor for advanced glycation end products  
 119 binding protein; **GMCSF** granulocyte macrophage colony stimulating factor; **HMGB1** high mobility group box 1 protein; **ICAM1**  
 120 intracellular adhesion molecule 1; **IFN $\gamma$**  interferon  $\gamma$ ; **IL** interleukin; **MMP9** matrix metalloproteinase 9; **MPO** myeloperoxidase; **NE**  
 121 neutrophil elastase; **PR3** proteinase 3; **sRAGE** soluble receptor for advanced glycation products; **SLPI** secretory leukoprotease  
 122 inhibitor; **TARC** thymus and activation regulation chemokine; **TNF $\alpha$**  tumor necrosis factor  $\alpha$ ; **YKL40** chitinase 3-like 1 protein.
