# Supplementary material for: Associations of Sputum Biomarkers with Clinical Outcomes in People with Cystic Fibrosis
Source: bioRxiv or medRxiv preprint supplement (doi:10.1101/2022.05.25.22275540), 2022-05-26
Supplement: Supplementary file [file media-9.pdf]

**Supplemental Table 9. Biomarkers in Adjusted\* Proportional Hazards Models of Time to Next Exacerbation\***

| Univariable Biomarker† | Data Adjusted for Detection Limits |      |              |          |                            | Data Adjusted and Imputed for Missingness |      |              |          |                            |
|------------------------|------------------------------------|------|--------------|----------|----------------------------|-------------------------------------------|------|--------------|----------|----------------------------|
|                        | Estimate                           | SE   | Hazard Ratio | <i>p</i> | 95% CI of the Hazard Ratio | Estimate                                  | SE   | Hazard Ratio | <i>p</i> | 95% CI of the Hazard Ratio |
| ENRAGE                 | 0.30                               | 0.10 | 1.35         | 0.003    | 1.10 to 1.65               | 0.30                                      | 0.10 | 1.34         | 0.004    | 1.10 to 1.64               |
| MPO                    | 0.26                               | 0.10 | 1.30         | 0.008    | 1.07 to 1.57               | 0.28                                      | 0.10 | 1.32         | 0.006    | 1.08 to 1.61               |
| SRAGE                  | 0.20                               | 0.09 | 1.23         | 0.021    | 1.03 to 1.46               | 0.25                                      | 0.10 | 1.29         | 0.009    | 1.06 to 1.55               |
| ICAM1                  | 0.38                               | 0.16 | 1.46         | 0.021    | 1.06 to 2.02               | 0.22                                      | 0.09 | 1.24         | 0.014    | 1.04 to 1.47               |
| NE                     | 0.18                               | 0.08 | 1.19         | 0.022    | 1.03 to 1.39               | 0.21                                      | 0.09 | 1.24         | 0.015    | 1.04 to 1.47               |
| YKL40                  | 0.23                               | 0.10 | 1.26         | 0.024    | 1.03 to 1.53               | 0.34                                      | 0.15 | 1.41         | 0.020    | 1.06 to 1.88               |
| TARC                   | 1.00                               | 0.46 | 2.72         | 0.031    | 1.10 to 6.74               | 0.18                                      | 0.08 | 1.19         | 0.022    | 1.03 to 1.39               |
| MMP9                   | 0.18                               | 0.09 | 1.20         | 0.039    | 1.01 to 1.43               | 0.16                                      | 0.08 | 1.17         | 0.047    | 1.00 to 1.37               |
| IL1β                   | 0.16                               | 0.08 | 1.17         | 0.049    | 1.00 to 1.37               | 0.82                                      | 0.44 | 2.27         | 0.062    | 0.96 to 5.38               |
| IL5                    | 0.58                               | 0.31 | 1.79         | 0.062    | 0.97 to 3.29               | 0.54                                      | 0.31 | 1.72         | 0.077    | 0.94 to 3.15               |
| IL17A                  | 0.28                               | 0.17 | 1.32         | 0.098    | 0.95 to 1.83               | 0.28                                      | 0.16 | 1.32         | 0.091    | 0.96 to 1.82               |
| S100A9                 | -0.20                              | 0.12 | 0.82         | 0.12     | 0.645 to 1.05              | 0.17                                      | 0.10 | 1.19         | 0.092    | 0.97 to 1.45               |
| IFNγ                   | 0.37                               | 0.26 | 1.44         | 0.16     | 0.861 to 2.41              | 0.34                                      | 0.26 | 1.40         | 0.19     | 0.84 to 2.34               |
| PR3                    | 0.12                               | 0.09 | 1.13         | 0.19     | 0.94 to 1.36               | 0.29                                      | 0.25 | 1.34         | 0.24     | 0.82 to 2.19               |
| IL8                    | 0.30                               | 0.25 | 1.36         | 0.23     | 0.823 to 2.23              | -0.09                                     | 0.09 | 0.92         | 0.33     | 0.77 to 1.09               |
| GMCSF                  | 0.29                               | 0.27 | 1.34         | 0.28     | 0.784 to 2.30              | 0.03                                      | 0.04 | 1.03         | 0.34     | 0.97 to 1.11               |
| SLPI                   | -0.09                              | 0.09 | 0.91         | 0.30     | 0.762 to 1.09              | -0.11                                     | 0.14 | 0.90         | 0.43     | 0.69 to 1.17               |
| Calprotectin           | 0.03                               | 0.04 | 1.03         | 0.34     | 0.966 to 1.11              | -0.11                                     | 0.17 | 0.90         | 0.53     | 0.65 to 1.25               |
| IL10                   | 0.09                               | 0.15 | 1.10         | 0.54     | 0.817 to 1.47              | 0.19                                      | 0.32 | 1.21         | 0.55     | 0.64 to 2.29               |
| S100A8                 | -0.06                              | 0.14 | 0.94         | 0.67     | 0.709 to 1.25              | 0.09                                      | 0.15 | 1.09         | 0.58     | 0.80 to 1.47               |
| TNFα                   | -0.04                              | 0.12 | 0.96         | 0.74     | 0.765 to 1.21              | -0.05                                     | 0.12 | 0.95         | 0.66     | 0.76 to 1.19               |
| HMGB1                  | -0.06                              | 0.17 | 0.95         | 0.75     | 0.677 to 1.32              | -0.04                                     | 0.14 | 0.96         | 0.78     | 0.73 to 1.27               |
| IL6                    | 0.04                               | 0.14 | 1.04         | 0.81     | 0.78 to 1.37               | 0.04                                      | 0.14 | 1.04         | 0.8      | 0.78 to 1.37               |
| CRP                    | -0.04                              | 0.19 | 0.96         | 0.84     | 0.662 to 1.40              | 0.06                                      | 0.36 | 1.07         | 0.86     | 0.53 to 2.15               |

\* Adjusted by Age, Sex and Number of Prior Pulmonary Exacerbations.

† **Abbreviations:** **CRP** C reactive protein; **ENRAGE** Extracellular newly identified receptor for advanced glycation end products binding protein; **GMCSF** granulocyte macrophage colony stimulating factor; **HMGB1** high mobility group box 1 protein; **ICAM1** intracellular adhesion molecule 1; **IFNγ** interferon γ; **IL** interleukin; **MMP9** matrix metalloproteinase 9; **MPO** myeloperoxidase; **NE** neutrophil elastase; **PR3** proteinase 3; **sRAGE** soluble receptor for advanced glycation products; **SLPI** secretory leukoprotease inhibitor; **TARC** thymus and activation regulation chemokine; **TNFα** tumor necrosis factor α; **YKL40** chitinase 3-like 1 protein.

124

125

126

127

128

129

130
