# Supplementary material for: Associations of Sputum Biomarkers with Clinical Outcomes in People with Cystic Fibrosis
Source: bioRxiv or medRxiv preprint supplement (doi:10.1101/2022.05.25.22275540), 2022-05-26
Supplement: Supplementary file [file media-10.pdf]

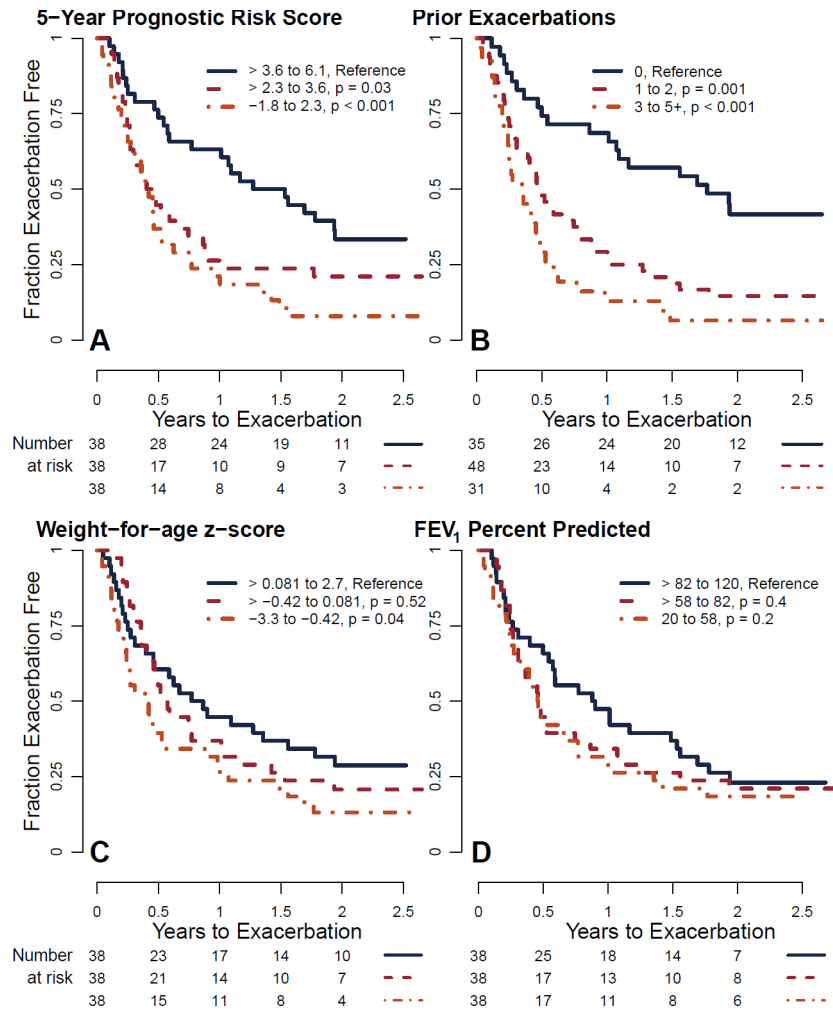

**Supplemental Figure 1. Kaplan-Meier Plots Exploring Relationships with Time to Next Pulmonary Exacerbation.** Patients were stratified into evenly sized groups as shown in each panel legend for (A) 5-Year Prognostic Risk Score, (B) Number of Pulmonary Exacerbations in the year prior to enrollment, (C) Weight-for-age z-score and (D) FEV<sub>1</sub>%. Groups are equal in size except for number of prior exacerbations because those values are ordinal and do not allow more even distribution.

132  
 133  
 134  
 135  
 136
