# Supplementary material for: Associations of Sputum Biomarkers with Clinical Outcomes in People with Cystic Fibrosis
Source: bioRxiv or medRxiv preprint supplement (doi:10.1101/2022.05.25.22275540), 2022-05-26
Supplement: Supplementary file [file media-11.pdf]

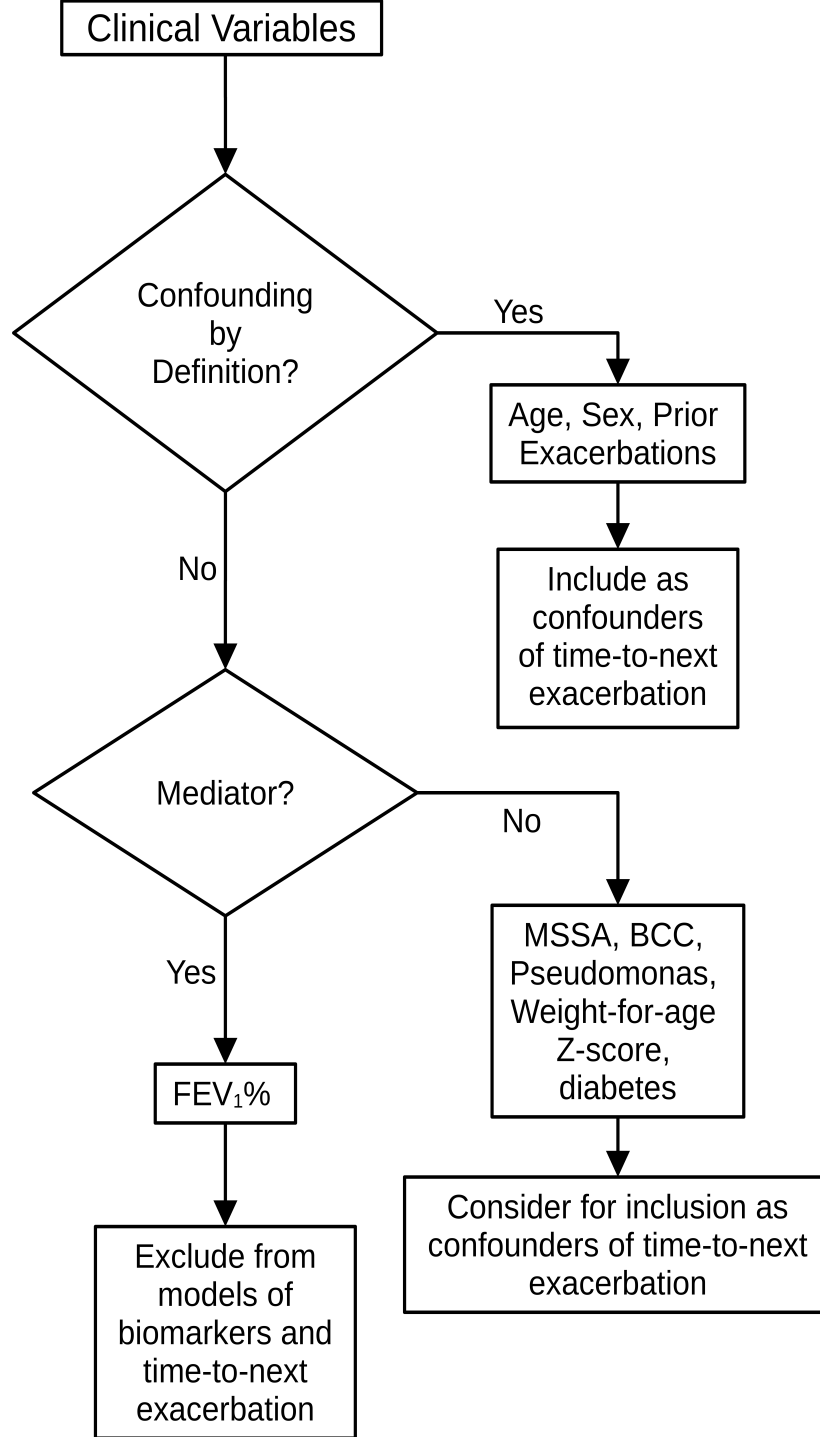

138 **Supplemental Figure 2. Confounding and Mediation Analysis.** Clinical variables were evaluated for their role as confounders and  
 139 mediators of the association of potential biomarkers of inflammation and time-to-next pulmonary exacerbation. See the website:  
 140 Mediation (David A. Kenny) [Internet] <https://davidakenny.net/cm/mediate.htm> cited March 14, 2022 and Baron RM, Kenny DA. The  
 141 moderator-mediator variable distinction in social psychological research: conceptual, strategic, and statistical considerations. *J Pers*  
 142 *Soc Psychol* 1986;51(6):1173–1182 for the adapted procedures.
