# Supplementary material for: Associations of Sputum Biomarkers with Clinical Outcomes in People with Cystic Fibrosis
Source: bioRxiv or medRxiv preprint supplement (doi:10.1101/2022.05.25.22275540), 2022-05-26
Supplement: Supplementary file [file media-12.pdf]

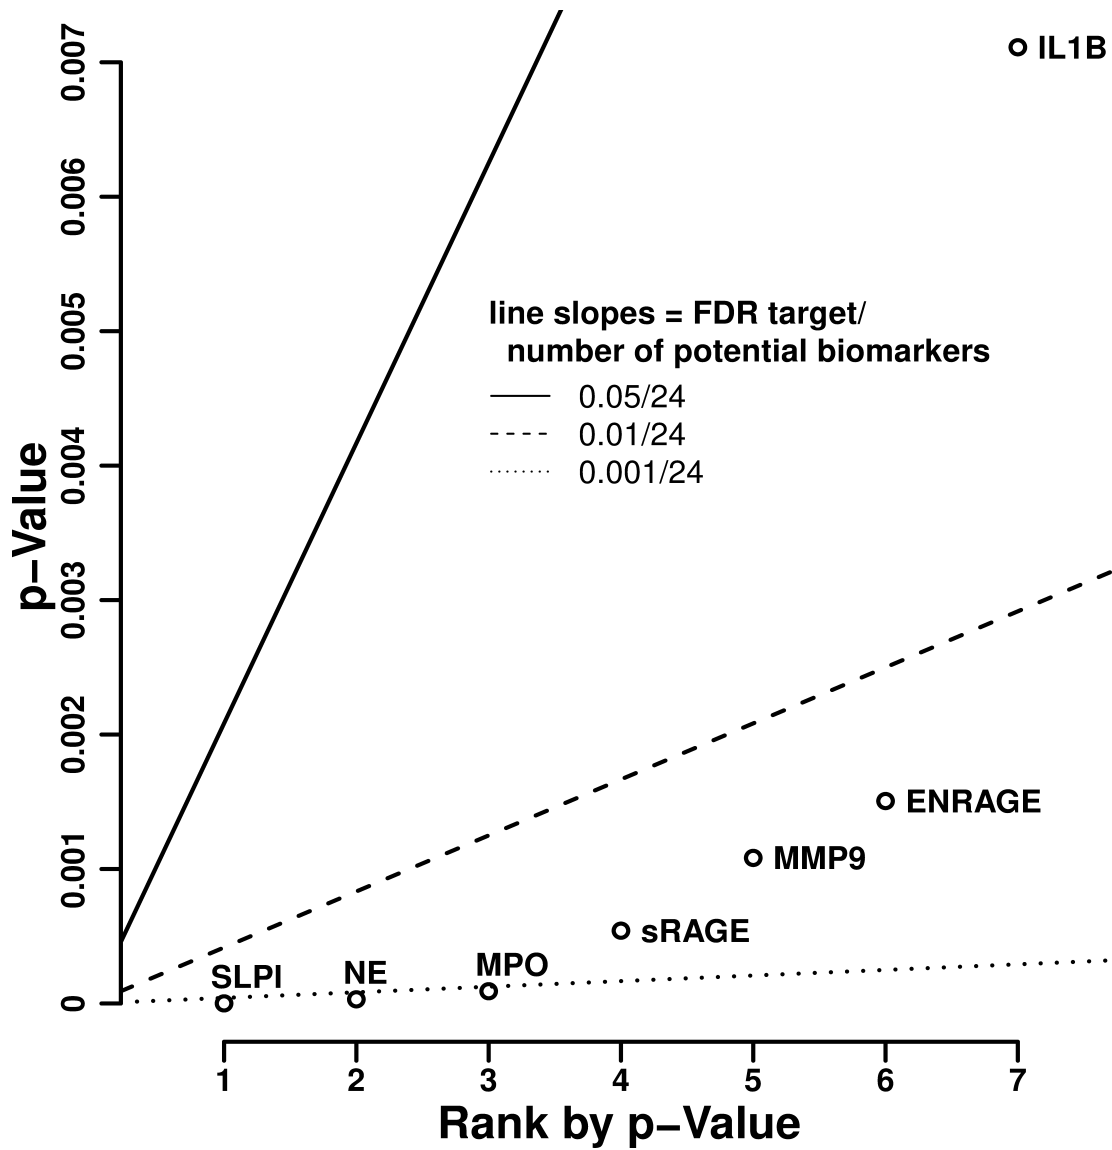

145 **Supplemental Figure 3. False Discovery Rate Analysis of Potential Biomarkers for Associations with FEV<sub>1</sub>%** Using the *p*-values  
 146 of each inflammatory marker from univariable linear regression models for FEV<sub>1</sub>%, we ranked the potential biomarkers by *p*-value  
 147 and drew lines with slopes determined by the threshold for false discovery (set to 0.05, 0.01 and 0.001) divided by the number of  
 148 potential biomarkers in the entire study. Biomarkers falling below a line have chance of being true findings that equal 1 – false  
 149 discovery set point for that line. Three biomarkers fall below the FDR 0.001 line, three fall below FDR 0.01 and one falls below the  
 150 FDR 0.05 line in this case.

151

152
