# Supplementary material for: Associations of Sputum Biomarkers with Clinical Outcomes in People with Cystic Fibrosis
Source: bioRxiv or medRxiv preprint supplement (doi:10.1101/2022.05.25.22275540), 2022-05-26
Supplement: Supplementary file [file media-13.pdf]

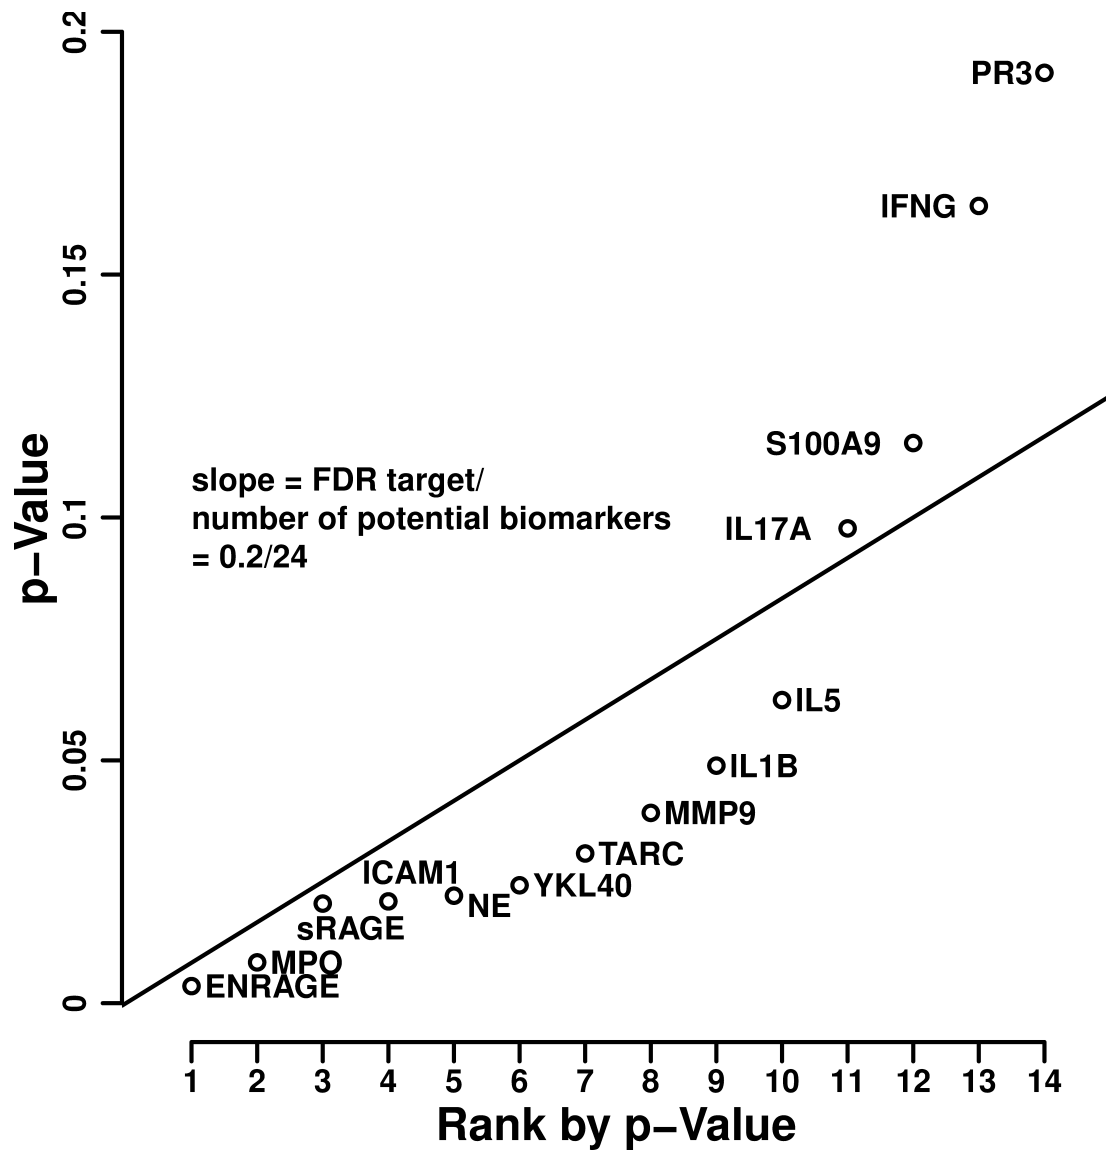

154 **Supplemental Figure 4. False Discovery Rate Analysis of Potential Biomarkers for Associations with Time to Next**  
 155 **Exacerbation** Using the  $p$ -values of each inflammatory marker from proportional hazards models for time to next exacerbation with  
 156 adjustments for age, sex and number of prior exacerbations in the year prior to study enrollment, we ranked the potential biomarkers  
 157 by  $p$ -value and drew a line with a slope determined by the threshold for false discovery (set to 0.2) divided by the number of  
 158 potential biomarkers in the entire study. Any biomarker falling below the line has a chance of being a true finding that is equal to 1 –  
 159 false discovery set point. In this case, ten biomarkers fall below the line suggesting that 8 of them are likely to be true findings.
