# Supplementary material for: Associations of Sputum Biomarkers with Clinical Outcomes in People with Cystic Fibrosis
Source: bioRxiv or medRxiv preprint supplement (doi:10.1101/2022.05.25.22275540), 2022-05-26
Supplement: Supplementary file [file media-14.pdf]

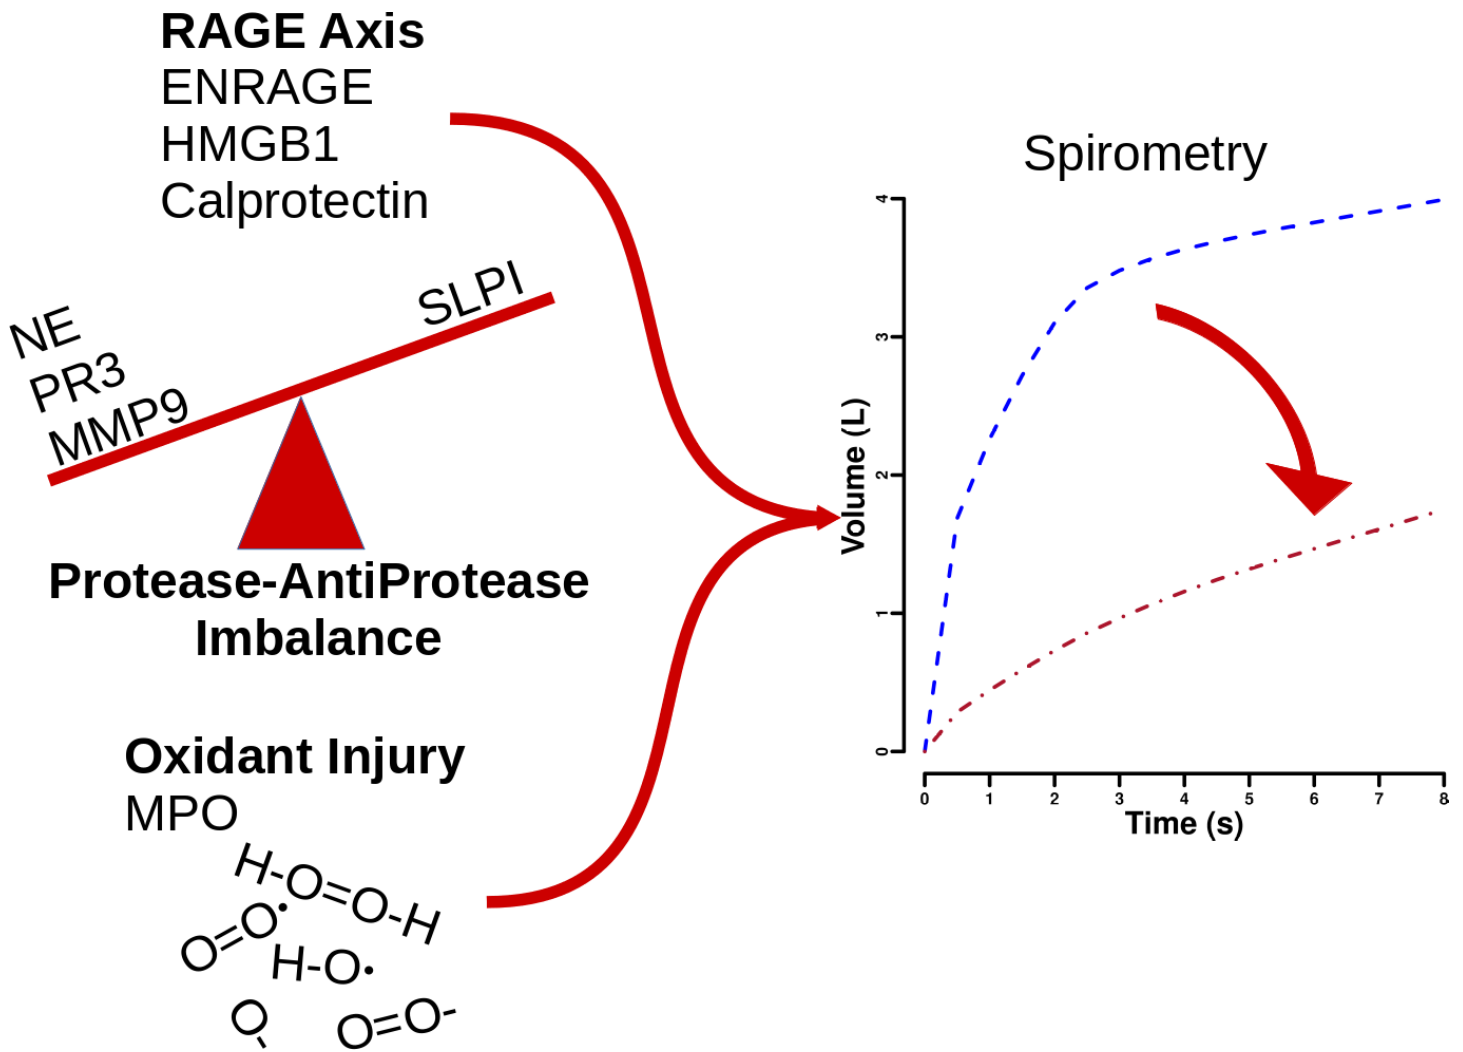

161 Supplemental Figure 5. Relationship between RAGE Axis, Protease-Antiprotease Imbalance, Oxidant Injury and Lung  
 162 Function. Three pathways of injury with representative biomarkers shown contribute to reducing lung function.
